# Supplementary material
Source: PubMed Central journal article supplement (PMC3375922)
Supplement: supp_pp.112.194753_194753revSupplementaryFigures_LegendsAndTables.pdf [file supp_pp.112.194753_194753revSupplementaryFigures_LegendsAndTables.pdf]

## SUPPORTING INFORMATION

### Supplemental Figure S1 to S4

Phylogenetic trees for four protein families were constructed to find the number of proteins for enzymes that are likely to have the same catalytic function in flavonoid biosynthesis based on their sequence similarity (see Table S1). Only clades depicting the proteins of interest are highlighted in colour. In these regions, statistically significant nodes (>90% using 100 or 1000 bootstrap datasets) are shown in red and proteins are indicated as follows: Lotus (Lj) - green, Medicago (Ms/Mt) and other legumes - dark green, Arabidopsis (At) - black, monocot species (rice (Os), maize (Zm), Brachypodium (Bd)) - yellow and other species - blue. Relevant accession numbers are shown to the right of the gene name. To view the larger trees, zoom to 400X or greater. These trees are also available at the IT3F website (Bailey et al. 2008).

**Supplemental Figure S1.** Phylogenetic tree of CHI-like proteins. In Lotus, the proteins involved in isoflavonoid biosynthesis are LjCHI1, LjCHI3 and LjCHI4

**Supplemental Figure S2.** Phylogenetic tree of the Nmr family containing proteins that encode enzymes for IFR, LAR, PTR and PLR (pinoresinol-lariciresinol reductase).

**Supplemental Figure S3.** Phylogenetic tree of the epimerase family containing proteins that encode enzymes for DFR and VR.

**Supplemental Figure S4.** Phylogenetic tree of the 2-oxoglutarate and Fe(II)-dependent oxygenase family containing proteins that encode enzymes for F3H, ANS/LDOX, and FLS.

**Supplemental Figure S5.** Phylogenetic tree of subgroup 2 proteins from Arabidopsis, Lotus, rice and Brachypodium and a related but distinct set of proteins that were found to date (July 2011) to be present in 13 dicot species, including legume species.

Bootstrap values (>70%) are indicated and are shown in red if they are >90% and help to define a clade of proteins that are distinct from the rest of the proteins in the data set. Of particular note is a subclade of legume-specific proteins within the

subgroup 2 sister clade that cluster with a significant bootstrap value of 99% reflecting the difference in their DNA binding domain protein sequence compared to the rest of the subgroup 2 sister clade, including two legume genes from *Medicago* and *Lotus* that fall outside the subclade.

**Supplemental Figure S6.** Phylogenetic tree of the WRKY family showing proteins from *Lotus* and *Medicago*.

Indicated are *Lotus* (Lj) and *Medicago* (Medtr) proteins with a greater than 2-fold increase (up - red) or decrease (down - blue) in expression after 3 h GSH treatment (*Lotus*) or 2h YE (*Medicago*; Naoumkina et al. 2007). Bootstrap values (>70% of 100 datasets) are indicated and are shown in red if they are statistically significant (>90%) and confirm orthologous proteins in *Lotus* and *Medicago*.

\*genes induced in both YE-treated and cells treated with methyl jasmonate (MJ).

**Supplemental Figure S7.** Graph showing that SYBR-Gold nucleic acid gel stain detects DNA in a linear manner from 4 to 56 ng. This range coincided with the amount of PCR product quantified in the experiments presented in Fig.3 and Fig 4.

**Supplemental File S1.** Protein sequences with appropriate accession identifiers of all the *Lotus* TFs reported in this study and of all other R2R3MYB and WRKY proteins used in the phylogenetic analyses.

**Supplemental Table S1.** Summary of Lotus genes encoding enzymes in the phenylpropanoid pathway used in the microarray experiments. The pFAM protein families to which these genes belong are indicated.

| Pathway                         | Enzyme                                                                                  | pFAM Clan ID (Description) | pFAM ID (Description)                                   | Number Of Genes For Each Enzyme In Lotus          |
|---------------------------------|-----------------------------------------------------------------------------------------|----------------------------|---------------------------------------------------------|---------------------------------------------------|
| <b>General phenylpropanoid:</b> |                                                                                         |                            |                                                         |                                                   |
|                                 | phenylalanine ammonia lyase (PAL)                                                       |                            | PF00221 (Phenylalanine and histidine ammonia-lyase)     | 14                                                |
|                                 | cinnamate 4-hydroxylase (C4H;CYP73A)                                                    |                            | PF00067 (cytochrome P450)                               | 5                                                 |
|                                 | p-Coumaroyl CoA Ligase (4CL)                                                            | CL0378 (ANL)               | PF00501 (AMP-binding enzyme)                            | 19                                                |
| <b>Flavonoid:</b>               |                                                                                         |                            |                                                         |                                                   |
|                                 | chalcone synthase (CHS)                                                                 | CL0046 (thiolase)          | PF00195 and PF02797 (chalcone and stilbene synthase)    | 20                                                |
|                                 | chalcone reductase (CHR)<br>also known as polyketide reductase (PKR)                    |                            | PF00248 (Aldo/keto reductase)                           | 17                                                |
|                                 | chalcone isomerases (CHI)                                                               |                            | PF02431 (chalcone-flavanone isomerise)                  | type I: 1 <sup>a</sup><br>type II: 3 <sup>a</sup> |
|                                 | flavanone 3-hydroxylase (F3H)                                                           | CL0029 (Cupin)             | PF03171 (2-oxoglutarate and Fe(II)-dependent oxygenase) | 2 <sup>a</sup>                                    |
|                                 | dihydroflavonol reductase (DFR)                                                         | CL0063 (NADP Rossmann)     | PF01370 (NAD dependent epimerase/dehydratase)           | 5 <sup>a</sup>                                    |
|                                 | flavonol synthase (FLS)                                                                 | CL0029                     | PF03171                                                 | 3 <sup>a</sup>                                    |
|                                 | leucoanthocyanidin dioxygenase (LDOX)                                                   | CL0029                     | PF03171                                                 | 1 <sup>a</sup>                                    |
|                                 | leucoanthocyanidin reductase (LAR)                                                      | CL0063                     | PF01370                                                 | 1 <sup>a</sup>                                    |
| <b>Isoflavonoid:</b>            |                                                                                         |                            |                                                         |                                                   |
|                                 | isoflavone synthase (IFS; CYP93C)                                                       |                            | PF00067                                                 | 3                                                 |
|                                 | S-Adenosyl-L-Methionine: 2,7,4'-Trihydroxyisoflavanone 4'-O-Methyltransferase (HI4'OMT) | CL0063                     | PF00891 (O-methyltransferase)                           | 6                                                 |
|                                 | 2-hydroxyisoflavanone dehydratase (HID)                                                 | CL0028 (AB_hydrolase)      | PF07859 (Abhydrolase_3)                                 | 4                                                 |
|                                 | isoflavone 2'-hydroxylase (I2'H; CYP81E)                                                |                            | PF00067                                                 | 3                                                 |
|                                 | isoflavone reductase (IFR)                                                              | CL0063                     | PF05368 (NmrA-like)                                     | 2 <sup>a</sup>                                    |
|                                 | vestitone reductase (VR)                                                                | CL0063                     | PF01370                                                 | 1 <sup>a</sup>                                    |
|                                 | pterocarpan reductase (PTR)                                                             | CL0063                     | PF05368                                                 | 5 <sup>a</sup>                                    |

<sup>a</sup>numbers concluded from a phylogenetic tree of the protein family (Supplemental Fig. S1 to S4)

**Supplemental Table S2.** Genes encoding phenylpropanoid biosynthetic enzymes that increased in expression after three hours or six hours following elicitation, normalised with absolute fold change (FCA).

| Pathway                         | Gene Name                         | Kazusa Identifier                | FCA 0-3hrs | FCA 0-6hrs |
|---------------------------------|-----------------------------------|----------------------------------|------------|------------|
| <b>General phenylpropanoid:</b> |                                   |                                  |            |            |
|                                 | PAL2                              | chr1.CM0033.800                  | 16.2       | 5.7        |
|                                 | PAL3                              | chr1.CM0033.830                  | 10.2       | 4.7        |
|                                 | PAL4                              | chr1.CM0033.850                  | 11.4       | 4.0        |
|                                 | PAL8                              | chr3.CM0574.220                  | 24.7       | 5.3        |
|                                 | PAL14                             | LjSGA_036826.1                   | 36.0       | 10.7       |
|                                 | CYP73A (C4H1)                     | chr5.LjT24B10.30                 | 768.7      | 729.0      |
|                                 | CYP73A (C4H2)                     | LjSGA_003295.2                   | 4376.0     | 3512.0     |
|                                 | CYP73A99 <sup>b</sup> (a) (C4H3)  | LjSGA_082453.1                   | 10.7       | 18.2       |
|                                 | CYP73A99 <sup>b</sup> (b) ( C4H4) | LjSGA_029001.1                   | 27.7       | 33.6       |
|                                 | 4CL1/16 <sup>c</sup>              | chr2.CM0018.1240/chr6.CM0057.160 | 27.9       | 12.0       |
|                                 | 4CL12                             | LjSGA_063891.1                   | 11.1       | 16.5       |
|                                 | 4CL6                              | chr4.CM0061.190                  | 7.7        | 6.3        |
| <b>Flavonoid:</b>               |                                   |                                  |            |            |
|                                 | CHS8 <sup>a</sup>                 | chr2.CM0018.1080.nc              | 24.0       | 31.5       |
|                                 | CHS9 <sup>a</sup>                 | chr2.CM0018.1140.nc              | 15.6       | 12.7       |
|                                 | CHS10 <sup>a</sup>                | chr2.CM0018.700.nc               | 21.5       | 18.4       |
|                                 | CHS12 <sup>a</sup>                | chr1.CM0284.240.nc               | 21.4       | 17.1       |
|                                 | CHS13 <sup>a</sup>                | chr1.CM0284.250.nc               | 22.3       | 16.8       |
|                                 | CHS14                             | chr2.CM0018.1100.nc              | 23.8       | 18.8       |
|                                 | CHS15                             | chr2.CM0018.1150.nc              | 50.0       | 29.0       |
|                                 | CHS16                             | chr2.CM0018.1250.nc              | 27.8       | 21.9       |
|                                 | CHS17                             | chr2.CM0018.680.nc               | 20.8       | 17.1       |
|                                 | CHS18                             | chr2.CM0018.710.nc               | 26.0       | 22.7       |
|                                 | CHS20                             | chr3.CM0590.740.nc               | 60.7       | 35.5       |
|                                 | CHS22                             | chr4.CM0044.260.nd               | 11.9       | 10.9       |
|                                 | CHS24                             | chr1.CM0591.370.nd               | 69.3       | 50.4       |
|                                 | CHS25                             | chr1.CM0591.390.nd               | 28.3       | 21.9       |
|                                 | CHS27                             | chr1.CM0591.360.nd               | 33.7       | 21.0       |
|                                 | CHS28                             | LjSGA_132696.1                   | 37.2       | 27.3       |
|                                 | PKR1 <sup>a</sup>                 | chr2.CM0191.390.nc               | 91.5       | 43.4       |
|                                 | PKR2 <sup>a</sup>                 | chr2.CM0191.400.nc               | 188.6      | 154.3      |
|                                 | PKR3 <sup>a</sup>                 | chr2.CM0191.410.nc               | 147.3      | 116.0      |
|                                 | PKR4 <sup>a</sup>                 | chr2.CM0191.480.nc               | 101.4      | 40.6       |
|                                 | PKR5 <sup>ac</sup>                | CM1092.70.nc                     | 91.8       | 113.3      |
|                                 | PKR6 <sup>ac</sup>                | CM1092.80.nc                     | 101.2      | 118.8      |
|                                 | PKR7                              | LjSGA_019910.1                   | 56.5       | 29.9       |
|                                 | CHI6                              | chr5.CM0034.130.nc               | 17.4       | 24.2       |
| <b>Isoflavonoid:</b>            |                                   |                                  |            |            |
|                                 | IFS1 <sup>a</sup>                 | LjT24P23.50.nc                   | 5.6        | 3.7        |
|                                 | IFS2 <sup>a</sup>                 | chr4.CM0692.280.nc               | 53.3       | 20.3       |
|                                 | IFS4                              | LjSGA_087856.1                   | 26.2       | 10.9       |
|                                 | HI 4' O MT                        | LjT24P23.70.nc                   | 15.8       | 10.8       |
|                                 | HID1                              | LjSGA_020298.1                   | 5.9        | 20.8       |
|                                 | HID2                              | LjB01D01.120                     | 12.3       | 7.2        |
|                                 | CYP81E6 (I2'H)                    | chr4.CM0256.420                  | 15.4       | 10.3       |
|                                 | CYP81E41 (I2'H-like)              | chr2.CM0250.30                   | 52.4       | 99.8       |
|                                 | IFR1 <sup>a</sup>                 | chr2.CM0249.1070.nc              | 10.8       | 5.4        |
|                                 | IFR2 <sup>a</sup>                 | chr2.CM0249.1080.nc              | 6.4        | 3.0        |
|                                 | VR1 <sup>a</sup>                  | chr1.CM1255.320.nc               | 22.6       | 16.0       |
|                                 | VR2 <sup>a</sup>                  | chr1.CM1255.310.nc               | 26.4       | 50.9       |
|                                 | PTR1 <sup>a</sup>                 | chr3.CM0216.20.nd                | 17.3       | 20.9       |
|                                 | PTR2 <sup>a</sup>                 | chr3.CM0216.40.nd                | 127.4      | 113.2      |
|                                 | PTR3 <sup>a</sup>                 | chr3.CM0216.50.nd                | 13.6       | 5.9        |

<sup>a</sup>Gene names reported by Shimada et al. (2007)

<sup>b</sup>Presumed to be a single gene represented by 2 non-overlapping gene fragments

<sup>c</sup>Sequenced identity too high to discriminate individual genes

**Supplemental Table S3.** Genes encoding phenylpropanoid biosynthetic enzymes that decreased in expression after three hours or six hours following elicitation, normalised with absolute fold change (FCA).

| Pathway                         | Gene Name         | Kazusa ID            | FCA 0-3hrs | FCA 0-6 hrs |
|---------------------------------|-------------------|----------------------|------------|-------------|
| <b>General phenylpropanoid:</b> |                   |                      |            |             |
|                                 | PAL9              | chr5.LjT17D03.50.    | 40.7       | 8.7         |
|                                 | 4CL14             | LjSGA_094072.1       | 4.6        | 8.3         |
| <b>Flavonoid:</b>               |                   |                      |            |             |
|                                 | CHS1 <sup>a</sup> | chr1.CM0593.380.nc   | 348.8      | 557.7       |
|                                 | CHI5              | LjSGA_035547.1       | 14.2       | 40.7        |
|                                 | FLS2              | chr1.LjB17A22.120.nc | 219.7      | 446.1       |
| <b>Isoflavonoid(-like):</b>     |                   |                      |            |             |
|                                 | HID4              | LjB01D01.90          | 21.2       | 16.9        |
|                                 | CYP81E40          | chr2.CM0250.70       | 5.8        | 6.1         |
|                                 | VR-like           | chr1.CM0017.190      | 10.7       | 18.3        |

<sup>a</sup>Shimada et al. (2007)

## Supplemental Table S4. Sequences of primers used to confirm gene expression profiles.

| Gene      | Primer Sequence              |
|-----------|------------------------------|
| IFS1s     | TTCTTCTTAAGATACAACACAAAC     |
| IFS1as    | TAGAGTAATGTAAATGGATATACG     |
| IFS2s     | TCATAAAAGTACAACACAAATAAC     |
| IFS2as    | GAAAAGTGAATATGATTATTAATAC    |
| HI4'OMTs  | GGTGTGTGTGCTACAATTTC         |
| HI4'OMTas | ATAGATTTAACTTGCACCTCTG       |
| MYB13s    | GCCTCCAAATCCAACAAAGATGCC     |
| MYB13as   | GAACCTGGATTTGTCTGACTATTGAG   |
| MYB14s    | CAGAACACCAACAACAACCAAGCTC    |
| MYB14as   | TACCCTCATTGATCATGCTTG        |
| MYB15s    | GATCTGATTCCAGTTCAGCACAC      |
| MYB15as   | AAGATAAGATTAATAATTGAGCCGTC   |
| CHS1s     | CTTGAGGCTTGAACCGAG           |
| CHS1as    | ATATCACTATTCTACATTATTGG      |
| F3Hs      | CAAACCTGACCCTACTATTG         |
| F3Has     | GTTACTTCAAAGACCTCGTAGG       |
| MYB3s     | CAGAATCAAGAACCTGGTTCTTCTC    |
| MYB3as    | ACTAGCTATTTCTGAGAAATTGCCTC   |
| MYB5s     | GCCTCTCCTGTGATCACAAATCAC     |
| MYB5as    | TTAATCAACATGCACTAGATATATATGC |
| MYB90s    | TAAATGCTCAAGAAGCTGAAGATCAC   |
| MYB90as   | GGCTTCTCTACCGTAGCAGGATC      |
| MYB134s   | CATCCGAAGGAAGCTAATAAAGATGG   |
| MYB134as  | ATCCAAAGGGAACACTACCAAGAAG    |
| UBQs      | CTACAACATTCAGAAGGAGTCCA      |
| UBQas     | GCACACACAGACAATCCTTCCAAC     |
| LjMyb14s  | CCATAACTCAATCATCAGACCC       |
| LjMyb14as | AGAAACTCTCATCAATTTTCAGG      |
| LjHIDs    | CTGTTTTGGAGTTCATACCCTG       |
| LjHIDas   | CAGATTCTCTGTCTCTCAGTTC       |
| LjVRs     | TGGAAGTTGTGACTCTGATTC        |
| LjI2'Hs   | GGGCTAACAACCCTGGAG           |
| LjI2'Has  | CATTGCCACACTTCTTCGTC         |
| LjVRas    | GACAATGAATGGGGAGCAGT         |
| LjPTRs    | TATCTTACTGTGGGTCATGTACTGC    |
| LjPTRas   | GACCTTACCTGGTATGTGCTC        |
| LjActins  | ATCATACTTCTATAACGAGCTTC      |
| LjActinas | GTGGCTGACACCATCACCAGAATC     |

**Supplemental Table S5.** Raw Intensity Signal for isoflavonoid-related genes with increased expression levels in all three independent transgenic lines constitutively expressing *LjMyb14* compared to wild-type MG20. Each gene was represented by two unique eArray probes and the Raw Intensity values are listed separately for each probe.

| Pathway Or Enzyme Class          | Gene Name            | Kazusa Identifier | eArray Probe         | Raw Intensity | Raw Intensity | Raw Intensity | Raw Intensity |
|----------------------------------|----------------------|-------------------|----------------------|---------------|---------------|---------------|---------------|
|                                  |                      |                   |                      | Wild-type     | LjMYB14-1     | LjMYB14-2     | LjMYB14-3     |
| <b>General phenylpropanoid:</b>  |                      |                   |                      |               |               |               |               |
|                                  | PAL4                 | chr1.CM0033.830   | CUST_510_PI399407686 | 263.08        | 620.09        | 565.57        | 577.76        |
|                                  |                      |                   | CUST_509_PI399407686 | 7727.23       | 19960.97      | 16912.80      | 21488.67      |
|                                  | PAL6                 | chr1.CM0033.960   | CUST_123_PI399407686 | 14366.51      | 34648.23      | 30219.22      | 39488.58      |
|                                  |                      |                   | CUST_124_PI399407686 | 5330.25       | 14273.21      | 12195.87      | 13802.19      |
|                                  | CYP73A99 (b)* (C4H3) | LjSGA_082453.1    | CUST_58_PI398500264  | 58.52         | 558.56        | 712.89        | 419.97        |
|                                  |                      |                   | CUST_57_PI398500264  | 312.48        | 2721.03       | 3049.95       | 3223.08       |
|                                  | CYP73A99(a)* (C4H4)  | LjSGA_029001.1    | CUST_451_PI398500264 | 51.53         | 374.37        | 487.24        | 216.79        |
|                                  |                      |                   | CUST_452_PI398500264 | 20.28         | 166.26        | 214.68        | 88.26         |
|                                  | CYP73A98 (C4H5)      | LjSGA_031602.1    | CUST_699_PI398500264 | 5584.75       | 18423.06      | 18351.91      | 15118.04      |
|                                  |                      |                   | CUST_698_PI398500264 | 6459.34       | 20151.57      | 19897.47      | 20806.50      |
|                                  | 4CL1                 | chr2.CM0018.1240  | CUST_396_PI399407686 | 517.74        | 1497.57       | 1495.99       | 1504.88       |
|                                  |                      |                   | CUST_395_PI399407686 | 560.24        | 1513.33       | 1502.94       | 1604.09       |
|                                  | 4CL16                | chr6.CM0057.160   | CUST_419_PI399407686 | 490.13        | 1410.52       | 1330.17       | 1470.32       |
|                                  |                      |                   | CUST_420_PI399407686 | 529.60        | 1506.98       | 1420.77       | 1538.94       |
|                                  | 4CL20                | LjSGA_016012.1    | CUST_420_PI399407686 | 529.60        | 1506.98       | 1420.77       | 1538.94       |
|                                  |                      |                   | CUST_325_PI399407686 | 624.48        | 1801.97       | 2008.03       | 1731.23       |
| <b>Isoflavonoid:</b>             |                      |                   |                      |               |               |               |               |
|                                  | PKR5                 | CM1092.70         | CUST_311_PI399407686 | 372.00        | 3136.56       | 3537.05       | 4667.22       |
|                                  |                      |                   | CUST_312_PI399407686 | 263.93        | 2267.34       | 2533.58       | 3308.96       |
|                                  | PKR6                 | CM1092.80         | CUST_78_PI399407686  | 248.20        | 2179.81       | 2397.24       | 3153.81       |
|                                  |                      |                   | CUST_77_PI399407686  | 383.20        | 3245.40       | 3702.96       | 4741.98       |
|                                  | H14' OMT             | LjT24P23.70       | CUST_431_PI399407686 | 2032.47       | 5092.47       | 4669.24       | 6469.47       |
|                                  |                      |                   | CUST_432_PI399407686 | 1132.56       | 2777.39       | 2738.68       | 3069.04       |
|                                  | HID2                 | LjB01D01.120      | CUST_137_PI399407686 | 482.32        | 1531.75       | 1686.63       | 1897.41       |
|                                  |                      |                   | CUST_138_PI399407686 | 580.57        | 1852.57       | 2102.53       | 2570.44       |
|                                  | CYP81E40 (I2H)       | chr2.CM0250.70    | CUST_504_PI398500264 | 34.23         | 171.16        | 178.04        | 111.30        |
|                                  |                      |                   | CUST_503_PI398500264 | 74.37         | 322.53        | 327.65        | 240.17        |
|                                  | VR                   | chr1.CM1255.320   | CUST_591_PI399407686 | 301.28        | 1836.06       | 2103.42       | 1887.81       |
|                                  |                      |                   | CUST_592_PI399407686 | 209.34        | 1447.14       | 1730.80       | 1429.27       |
|                                  | PTR3 (AB265591)      | chr3.CM0216.50    | CUST_85_PI399407686  | 477.19        | 1595.92       | 1512.80       | 1629.25       |
|                                  |                      |                   | CUST_86_PI399407686  | 237.44        | 765.71        | 723.39        | 788.19        |
| <b>UDP-glycosyltransferases:</b> |                      |                   |                      |               |               |               |               |
|                                  | UGT71B-like          | LjSGA_025093.1    | CUST_148_PI399390334 | 16.13         | 147.13        | 151.33        | 120.30        |
|                                  |                      |                   | CUST_147_PI399390334 | 29.14         | 184.65        | 181.19        | 160.29        |
|                                  | UGT71B-like          | LjSGA_066183.1    | CUST_18_PI399390334  | 197.78        | 214.80        | 207.29        | 33.86         |
|                                  |                      |                   | CUST_19_PI399390334  | 7.19          | 12.41         | 18.54         | 5.66          |
|                                  | UGT71B-like          | LjSGA_084705.1    | CUST_3_PI399390334   | 25.49         | 161.64        | 126.85        | 111.23        |
|                                  |                      |                   | CUST_4_PI399390334   | 18.63         | 83.12         | 77.84         | 79.17         |
|                                  | UGT71B-like          | LjSGA_128268.1    | CUST_242_PI399390334 | 43.61         | 282.24        | 245.24        | 249.62        |
|                                  |                      |                   | CUST_243_PI399390334 | 8.41          | 97.77         | 97.42         | 82.48         |
|                                  | UGT72B4              | chr1.CM0579.30    | CUST_265_PI399390334 | 2083.28       | 5607.01       | 7132.80       | 6070.81       |
|                                  |                      |                   | CUST_264_PI399390334 | 1927.91       | 5386.74       | 6789.96       | 5939.55       |
|                                  | UGT72B5              | chr3.LjT41F16     | CUST_170_PI399390334 | 3.83          | 46.65         | 43.03         | 46.53         |
|                                  |                      |                   | CUST_169_PI399390334 | 14.81         | 79.86         | 86.24         | 66.00         |
|                                  | UGT73B-like          | chr4.CM0739.130   | CUST_315_PI399390334 | 9.57          | 106.13        | 43.16         | 37.80         |
|                                  |                      |                   | CUST_314_PI399390334 | 7.37          | 80.53         | 28.31         | 26.07         |
|                                  | UGT73B-like          | chr6.LjT16B20.10  | CUST_300_PI399390334 | 9836.20       | 20043.77      | 21695.49      | 26850.51      |
|                                  |                      |                   | CUST_301_PI399390334 | 12831.02      | 26130.18      | 28163.07      | 34182.27      |
|                                  | UGT79B13             | chr3.LjT14J20.160 | CUST_232_PI399390334 | 109.30        | 341.03        | 393.45        | 451.46        |
|                                  |                      |                   | CUST_231_PI399390334 | 185.65        | 655.21        | 639.63        | 890.66        |
|                                  | UGT87E1              | chr3.LjT09A09.120 | CUST_196_PI399390334 | 1.71          | 17.82         | 11.17         | 12.50         |
|                                  |                      |                   | CUST_195_PI399390334 | 6.95          | 23.72         | 20.42         | 24.73         |
|                                  | UGT90A-like          | chr1.LjT14B18.140 | CUST_274_PI399390334 | 66.91         | 1906.74       | 1817.84       | 2108.00       |
|                                  |                      |                   | CUST_275_PI399390334 | 3.59          | 86.07         | 115.76        | 43.46         |
|                                  | UGT92A-like          | chr1.LjT14B18.160 | CUST_174_PI399390334 | 17.59         | 460.78        | 468.90        | 458.60        |
|                                  |                      |                   | CUST_173_PI399390334 | 8.09          | 227.78        | 221.33        | 169.27        |
|                                  | UGT92A-like          | LjT30N24.300      | CUST_303_PI399390334 | 2.23          | 28.43         | 73.65         | 33.08         |
|                                  |                      |                   | CUST_302_PI399390334 | 14.92         | 267.35        | 535.96        | 775.21        |

\*Presumed to be a single gene represented by two non-overlapping gene fragments

Figure S1

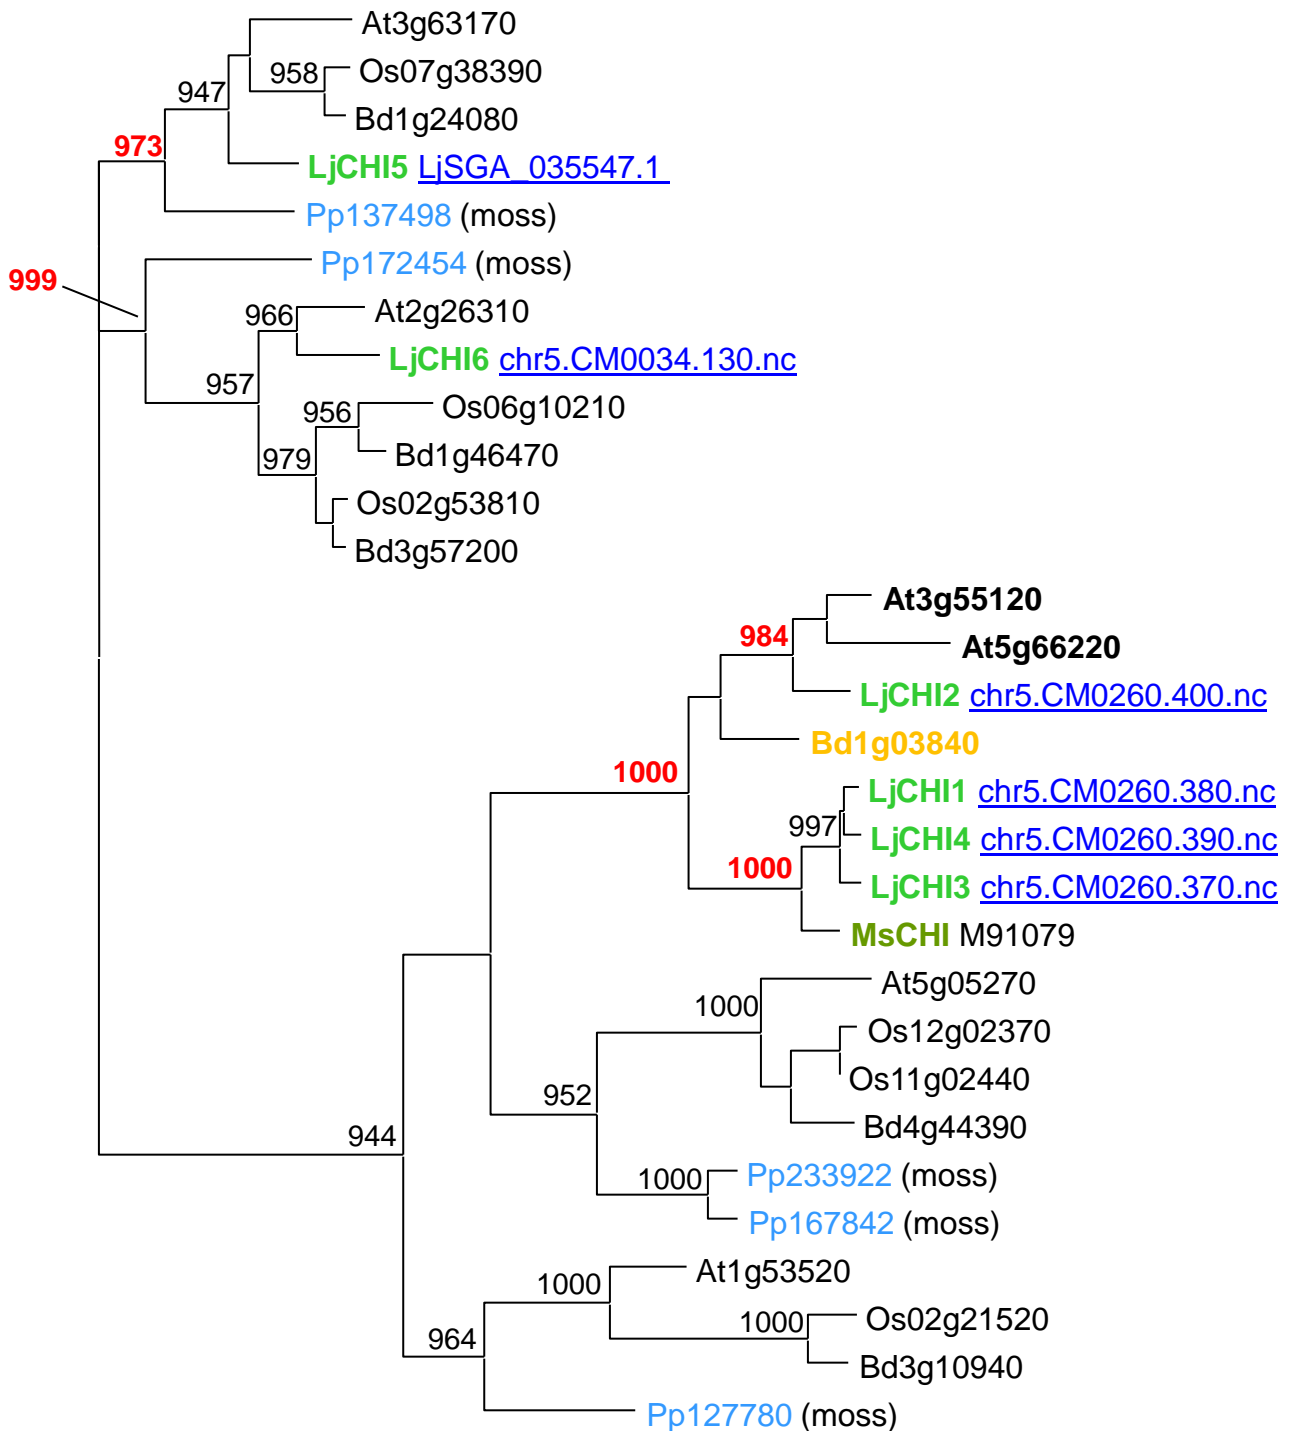

**Supplemental Figure S1.** Phylogenetic tree of CHI-like proteins. In Lotus, the proteins involved in isoflavonoid biosynthesis are LjCHI1, LjCHI3 and LjCHI4



Figure S2

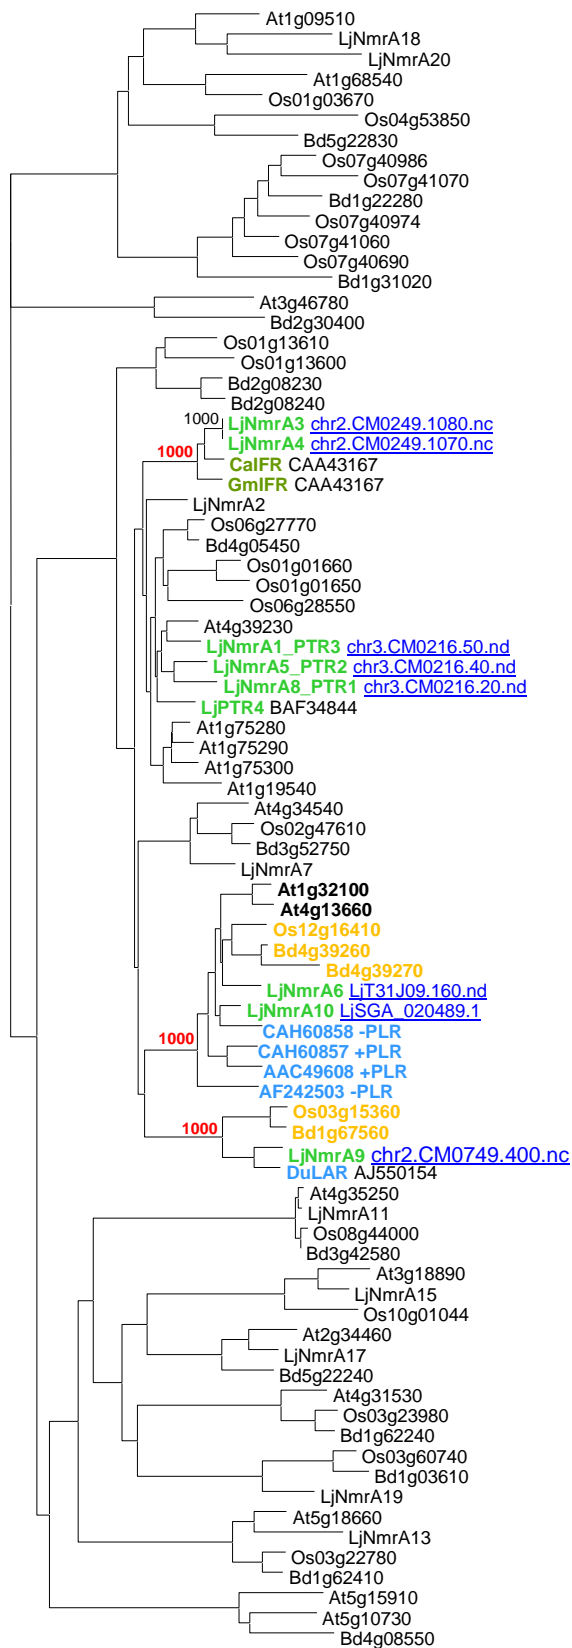

**Supplemental Figure S2.** Phylogenetic tree of the Nmr family containing proteins that encode enzymes for IFR, LAR, PTR and PLR (pinorexinol-lariciresinol reductase).



Figure S4

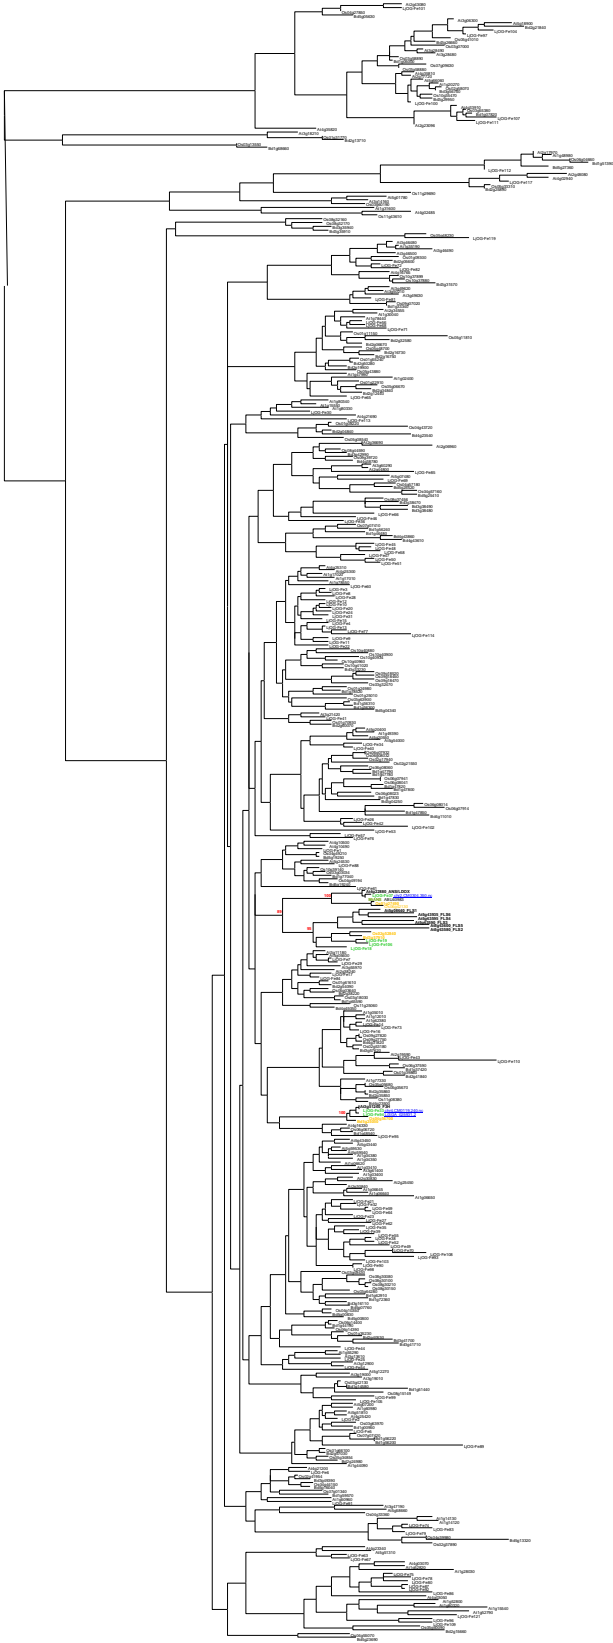

**Supplemental Figure S4.** Phylogenetic tree of the 2-oxoglutarate and Fe(II)-dependent oxygenase family containing proteins that encode enzymes for F3H, ANS/LDOX, and FLS.

Figure S5

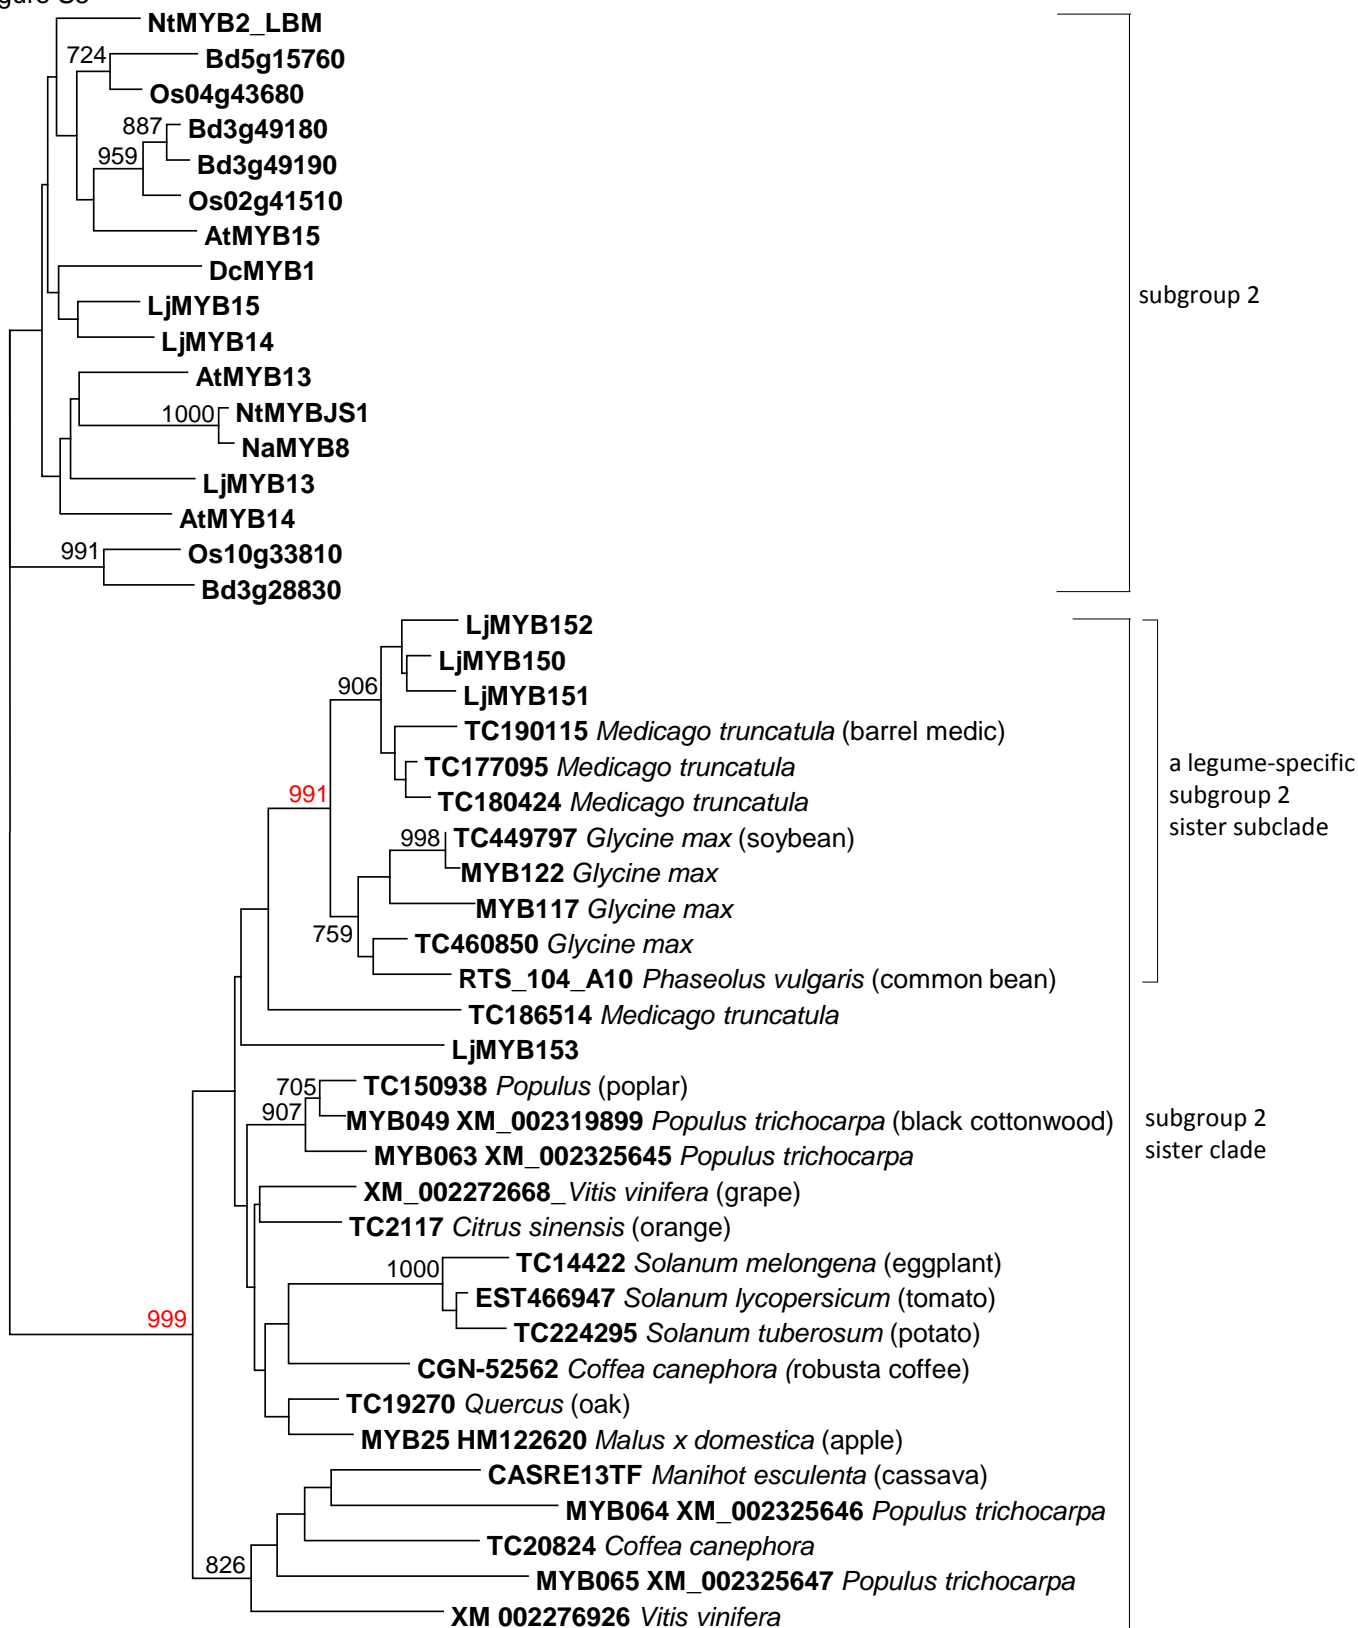

**Supplemental Figure S5.** Phylogenetic tree of subgroup 2 proteins from Arabidopsis, Lotus, rice and Brachypodium and a related but distinct set of proteins that were found to date (July 2011) to be present in 13 dicot species, including legume species. Bootstrap values (>70%) are indicated and are shown in red if they are >90% and help to define a clade of proteins that are distinct from the rest of the proteins in the data set. Of particular note is a subclade of legume-specific proteins within the subgroup 2 sister clade that cluster with a significant bootstrap value of 99% reflecting the difference in their DNA binding domain protein sequence compared to the rest of the subgroup 2 sister clade, including two legume genes from *Medicago* and *Lotus* that fall outside the subclade.

Figure S6

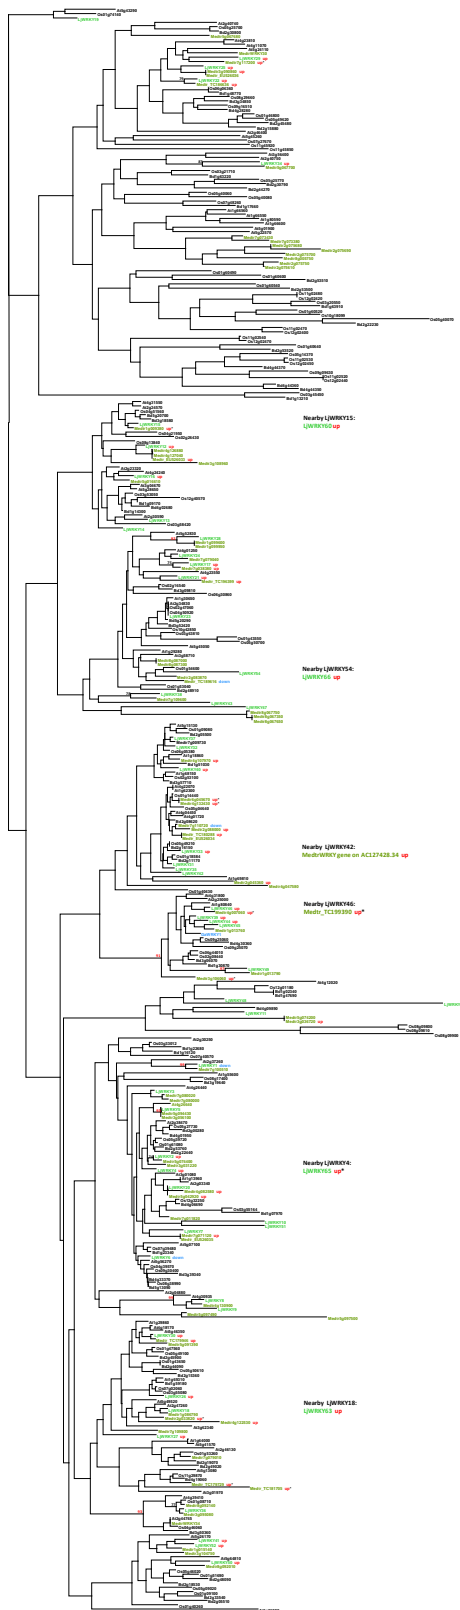

**Supplemental Figure S6.** Phylogenetic tree of the WRKY family showing proteins from Lotus and Medicago. Indicated are Lotus (Lj) and Medicago (Medtr) proteins with a greater than 2-fold increase (up - red) or decrease (down - blue) in expression after 3 h GSH treatment (Lotus) or 2h YE (Medicago; Naoumkina et al. 2007). Bootstrap values (>70% of 100 datasets) are indicated and are shown in red if they are statistically significant (>90%) and confirm orthologous proteins in Lotus and Medicago.

\*genes induced in both YE-treated and cells treated with methyl jasmonate (MJ).

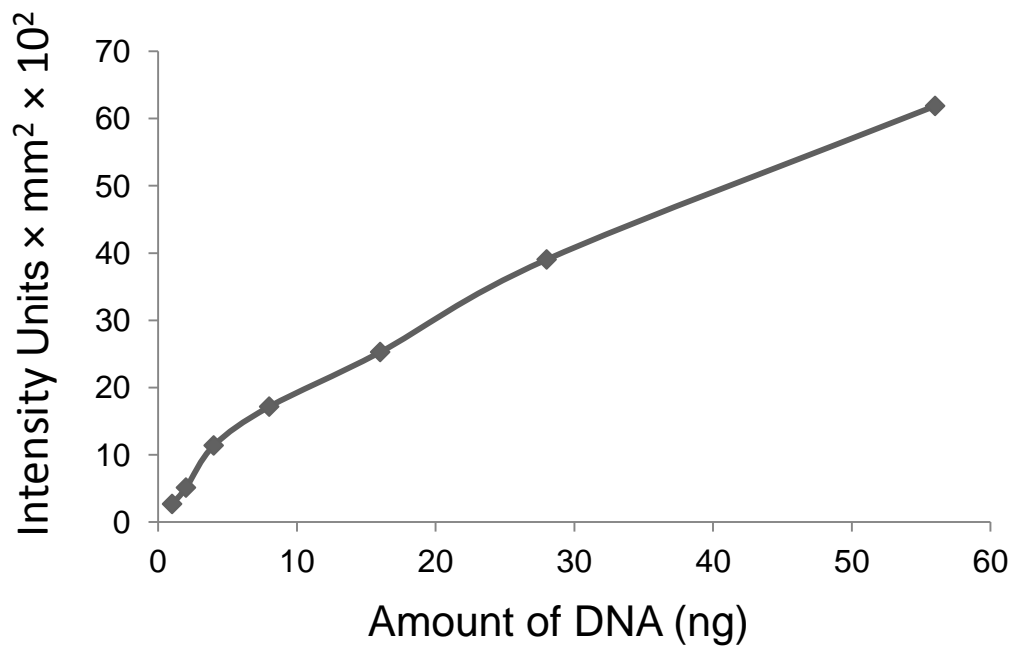

**Supplemental Figure S7.** Graph showing that SYBR-Gold nucleic acid gel stain detects DNA in a linear manner from 4 to 56 ng. This range coincided with the amount of PCR product quantified in the experiments presented in Fig.3 and Fig 4.
